# Supplementary material for: Low-cost solution-processed digenite Cu9S5 counter electrode for dye-sensitized solar cells
Source: Royal Society of Chemistry journal article supplement (doi:10.1039/c7ra06822k), 2017-01-01
Supplement: c7ra06822k1.pdf [file c7ra06822k1.pdf]

## Low-cost solution-processed digenite $\text{Cu}_9\text{S}_5$ counter electrode for dye-sensitized solar cells

Maowei Hu<sup>a</sup>, Ze Yu<sup>\*a</sup>, JiaJia Li<sup>a</sup>, Xiaoqing Jiang<sup>a</sup>, Jianbo Lai<sup>a</sup>, Xichuan Yang<sup>a</sup>, Mei Wang<sup>\*a</sup> and Licheng Sun<sup>a,b</sup>

<sup>a</sup>State Key Laboratory of Fine Chemicals, Institute of Artificial Photosynthesis, DUT-KTH Joint Education and Research Center on Molecular Devices, Dalian University of Technology (DUT), Dalian 116024, China. Email: ze.yu@dlut.edu.cn. Email: symbueno@dlut.edu.cn.

<sup>b</sup>Department of Chemistry, School of Chemical Science and Engineering, KTH Royal Institute of Technology, 100 44 Stockholm, Sweden.

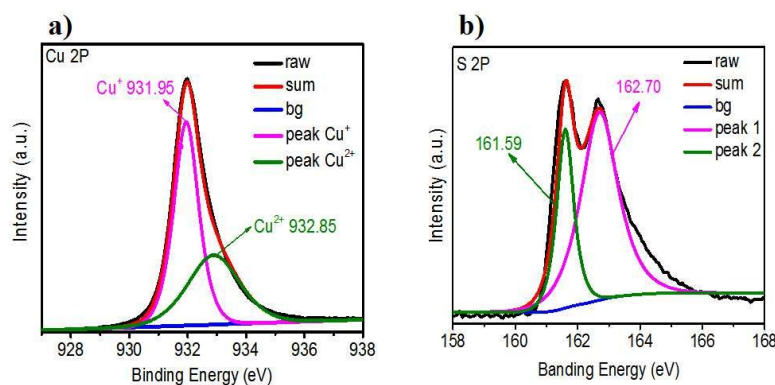

**Fig. S1.** (a) and (b) The Cu 2p and S 2p XPS spectrum of  $\text{Cu}_9\text{S}_5$  film on FTO substrate.

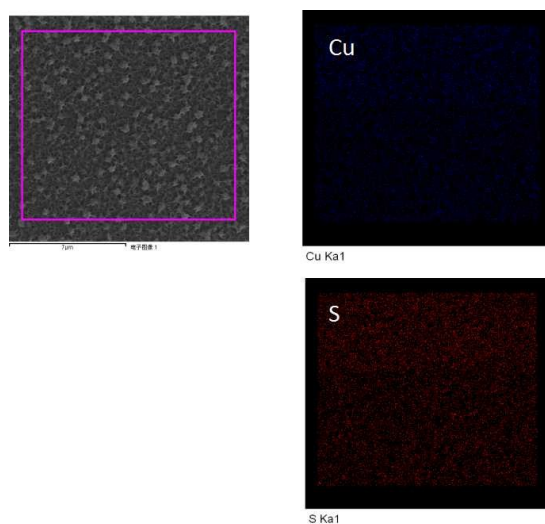

**Fig. S2.** EDS elemental mappings of  $\text{Cu}_9\text{S}_5$  film on FTO substrate.

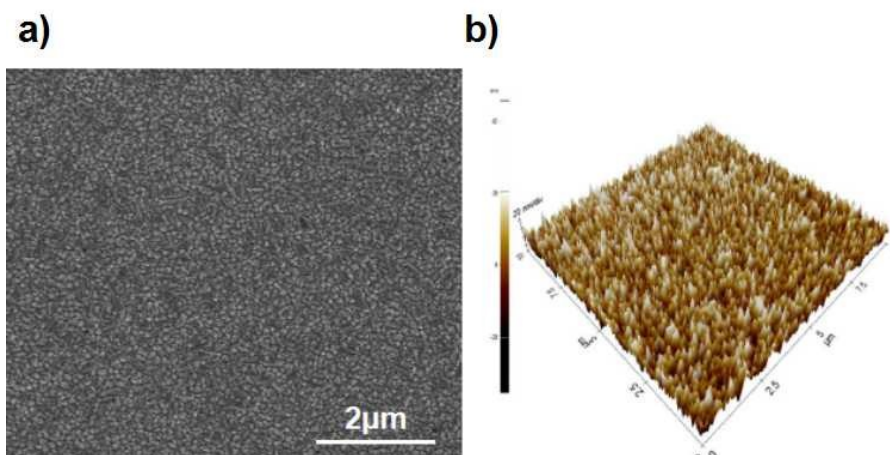

**Fig. S3.** (a) FE-SEM image of Pt CE on FTO substrate; (b) AFM image of Pt CE on FTO substrate.

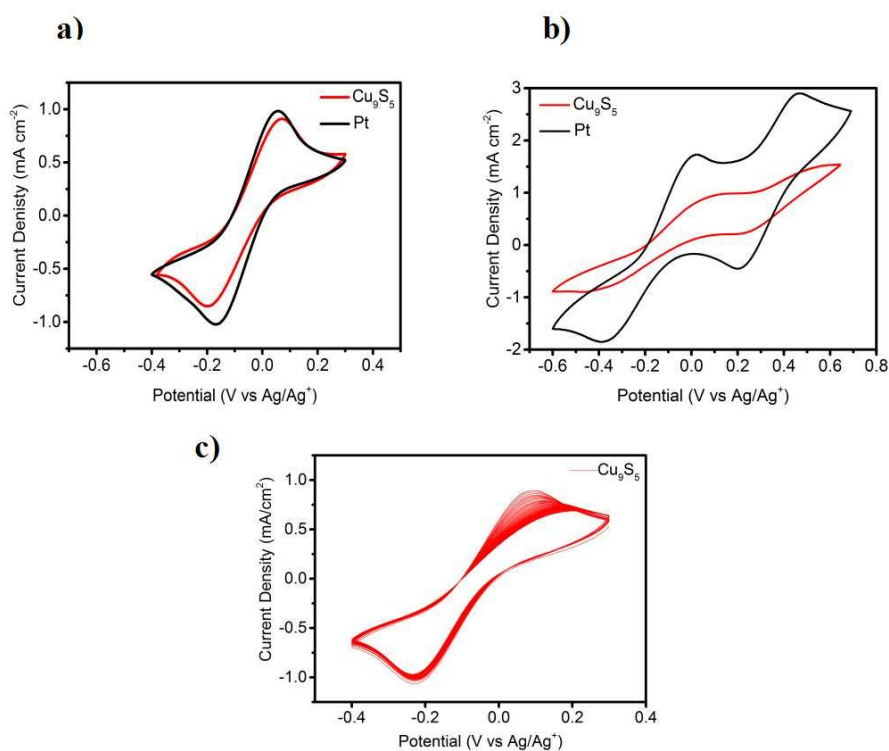

**Fig. S4.** Cyclic voltammograms for  $\text{Cu}_9\text{S}_5$  electrode (red line), Pt electrode (black line). (a) cobalt complex-based electrolyte in acetonitrile solution of 20 mM  $\text{Co}(\text{bpy})_3(\text{PF}_6)_2$ , 5 mM  $\text{Co}(\text{bpy})_3(\text{PF}_6)_3$ , and 100 mM  $\text{LiClO}_4$ ; (b) iodine-based electrolyte in acetonitrile solution of 10 mM  $\text{LiI}$ , 1 mM  $\text{I}_2$ , and 100 mM  $\text{LiClO}_4$ ; (c) 50 cycles of CV for as-prepared  $\text{Cu}_9\text{S}_5$  electrode. The counter electrode was a Pt wire and the reference electrode was  $\text{Ag}/\text{AgNO}_3$ . The scan rate was  $50 \text{ mV s}^{-1}$ .

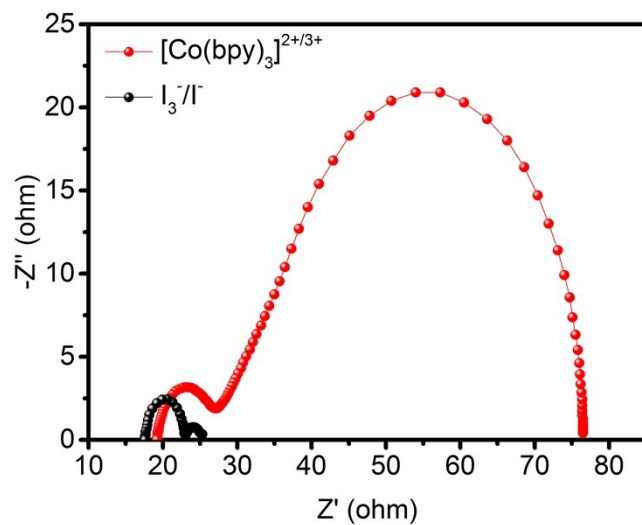

**Fig. S5.** Nyquist plots of the prepared Pt CEs in a symmetric sandwich cell configuration with  $[\text{Co}(\text{bpy})_3]^{2+/3+}$  and  $\text{I}^-/\text{I}_3^-$  based electrolytes.

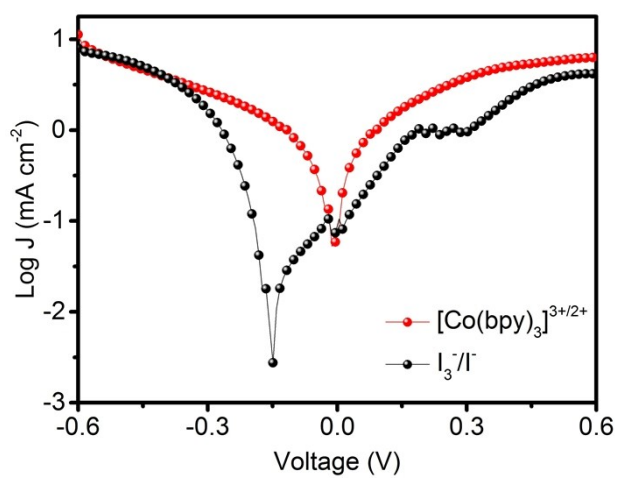

**Fig. S6.** Tafel-polarization curves of the prepared  $\text{Cu}_9\text{S}_5$  electrode in a dummy cell with  $[\text{Co}(\text{bpy})_3]^{2+/3+}$  and  $\text{I}^-/\text{I}_3^-$  based electrolytes

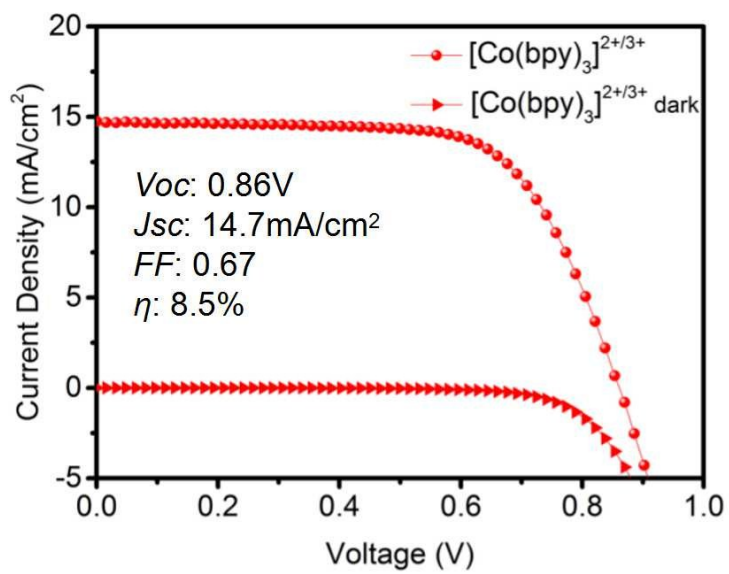

**Fig. S7.** Photocurrent density-voltage ( $J$ - $V$ ) curves of DSSCs Pt electrode with  $[\text{Co}(\text{bpy})_3]^{2+/3+}$  and  $\text{I}^-/\text{I}_3^-$  based electrolytes measured under AM 1.5G simulated sunlight ( $100 \text{ mW cm}^{-2}$ ) and in the dark.
